# Supplementary material
Source: PubMed Central journal article supplement (PMC5725374)
Supplement: 12264_2017_153_MOESM1_ESM.pdf [file 12264_2017_153_MOESM1_ESM.pdf]

## Supplementary Material

### MiR-30a Positively Regulates the Inflammatory Response of Microglia in Experimental Autoimmune Encephalomyelitis

Xue Fang, Dingya Sun, Zhihong Wang, Zhongwang Yu, Weili Liu, Yingyan Pu, Dan Wang, Aijun Huang, Mingdong Liu, Zhenghua Xiang, Cheng He, Li Cao

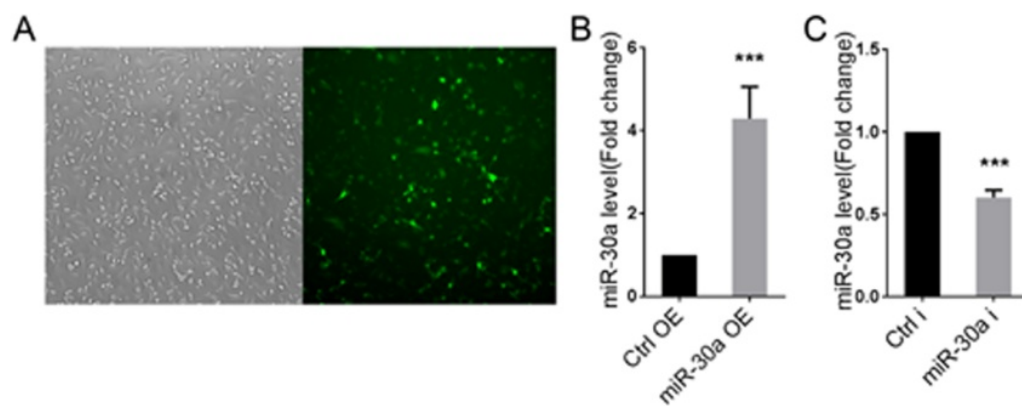

**Fig. S1** Lentivirus-mediated overexpression or knockdown of miR-30a in microglia. Representative fluorescence image (A) and quantitative PCR analysis of miR-30a in microglia transduced with the miR-30aOE (B) or miR-30ai (C) lentivirus.

\*\*\* $P < 0.005$  (Student's *t*-test); mean  $\pm$  SD.

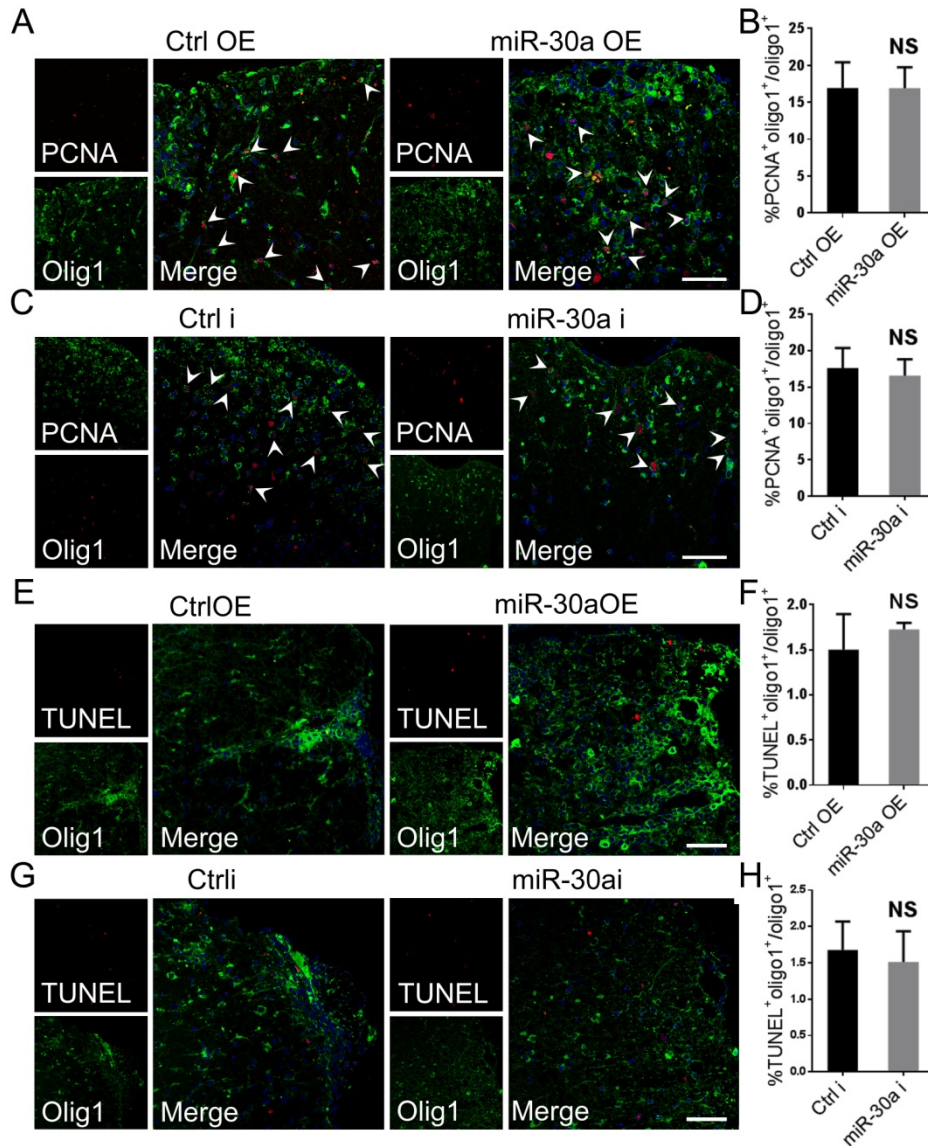

**Fig. S2 Effects of MiR-30a-modified microglia on survival and proliferation of OPCs *in vivo*.** A-D Representative fluorescence images and statistical analysis of anti-Olig1 (green) and anti-PCNA (red) IHF from EAE mice (30 dpi) transplanted with MG<sup>CtrlOE</sup>/MG<sup>miR-30aOE</sup> (A, B) or MG<sup>Ctrl i</sup>/MG<sup>miR-30a i</sup> (C, D) ( $n = 3$  experiments). Arrowheads indicate PCNA<sup>+</sup>Olig1<sup>+</sup> cells. The ratio of PCNA<sup>+</sup>/Olig1<sup>+</sup> cells was calculated and compared between groups. Scale bars, 50  $\mu$ m. No significant difference *versus* control (Student's *t*-test); mean  $\pm$  SD. E-H Representative fluorescence images and statistical analysis of anti-Olig1 (green) IHF and TUNEL

(red) analysis from EAE mice (30dpi) transplanted with  $MG^{CtrlOE}/MG^{miR-30aOE}$  (E, F) or  $MG^{Ctrli}/MG^{miR-30ai}$  (G, H) ( $n = 3$  experiments). The ratio of  $TUNEL^+/Olig1^+$  cells was calculated and compared between groups. Scale bars, 50  $\mu m$ . No significant difference *versus* control (Student's *t*-test); mean  $\pm$  SD.

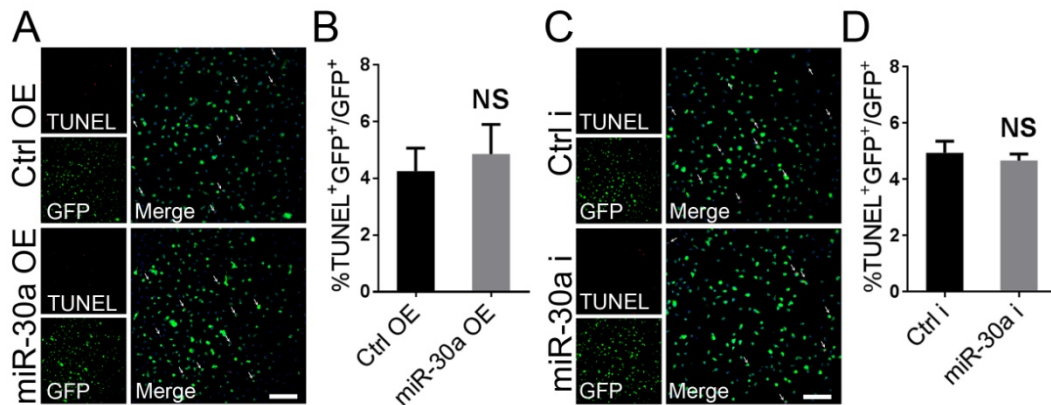

**Fig. S3 Effects of MiR-30a on survival of microglia.** TUNEL staining images and analysis of apoptosis in microglia after adding miR-30a OE (A, C) or miR-30ai (B, D) lentivirus for 24 h *versus* control ( $n = 3$  experiments). The ratio of  $TUNEL^+/Hoechst^+$  cells was calculated and compared between groups. Scale bars, 50  $\mu m$ . No significant difference *versus* control (Student's *t*-test); mean  $\pm$  SD.
